# Supplementary material for: Multi-responsive and programmable actuators made with nacre-inspired graphene oxide-bacterial cellulose film
Source: Royal Society of Chemistry journal article supplement (doi:10.1039/d2sm01380k), 2022-01-01
Supplement: d2sm01380k1.pdf [file d2sm01380k1.pdf]

## Supporting Information

### **Multi-responsive and programmable actuators made with nacre-inspired graphene oxide-bacterial cellulose film**

Kaihuai Yang<sup>1,\*</sup>, Wanling Cai<sup>1</sup>, Minli Lan<sup>1</sup>, Yuanji Ye<sup>2</sup>, Zhendong Tang<sup>2</sup>, Qiaohang Guo<sup>2</sup>, and Mingcen Weng<sup>2,\*</sup>

1 School of Mechanical and Intelligent Manufacturing, Fujian Chuanzheng Communications College, Fuzhou, Fujian 350007, China

2 School of Materials Science and Engineering, Fujian Provincial Key Laboratory of Advanced Materials Processing and Application, Key Laboratory of Polymer Materials and Products of Universities in Fujian, Fujian University of Technology, Fuzhou, Fujian 350118, China

Kaihuai Yang E-mail: [ykh1347@sina.com](mailto:ykh1347@sina.com)

Mingcen Weng E-mail: [wengmc@fjut.edu.cn](mailto:wengmc@fjut.edu.cn)

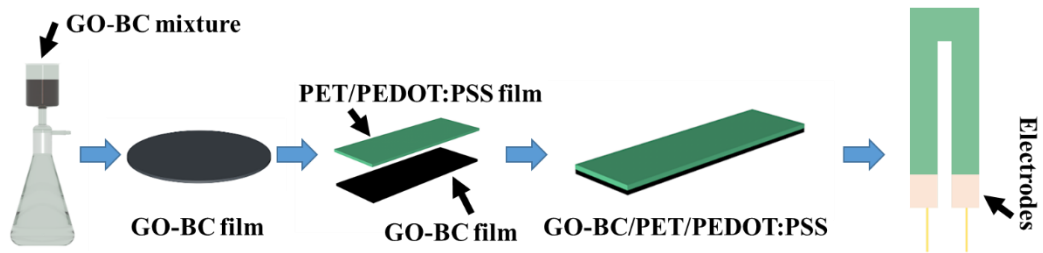

Fig. S1 Schematic diagram of the fabrication process of the actuator.

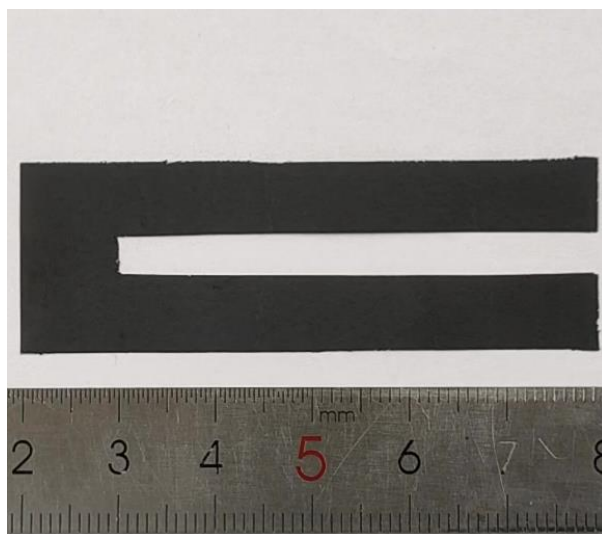

Fig. S2 The optical photo of the fabricated actuator.

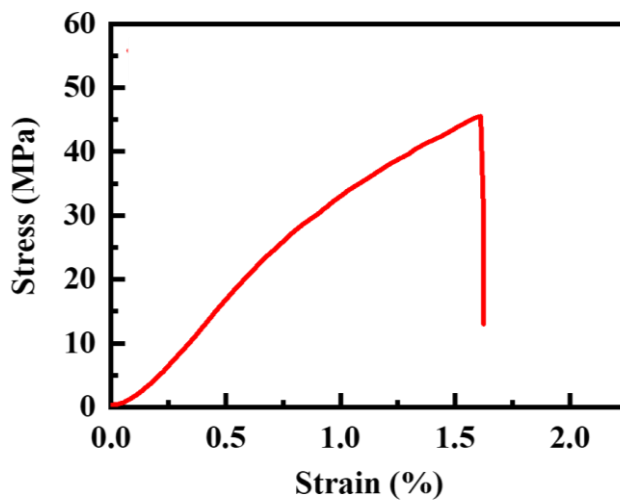

Fig. S3 The stress-strain curves of the pasted GO-BC film.

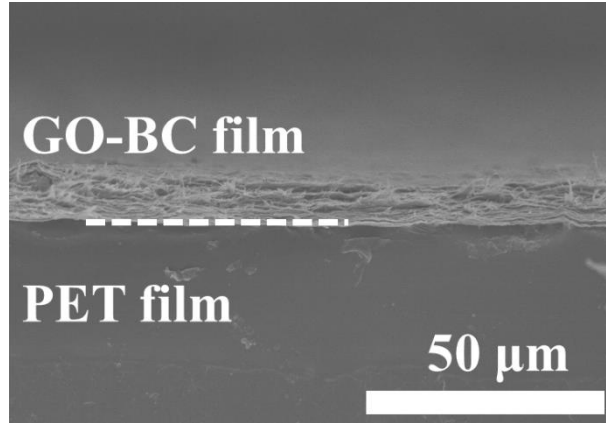

Fig. S4 The cross-sectional section of the GO-BC/PET/PEDOT: PSS actuator.

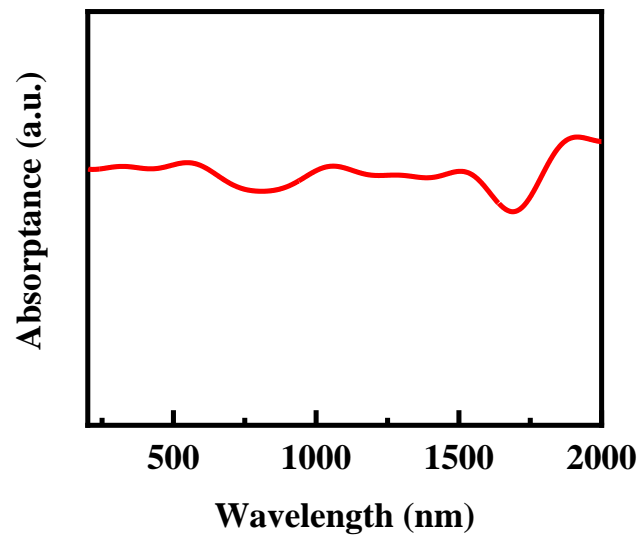

Fig. S5 The absorption spectrum of the GO-BC film.
